# Supplementary material
Source: MDPI journal article supplement (https://www.mdpi.com/2410-3888/7/4/209)
Supplement: s1 [file s1 › Supplementary Table S1.xlsx]

## Sheet: Kegg pathways
KEGG_Pathways	#OTU ID	W_IA_1	W_IA_2	W_IA_3	W_IA_4	W_IA_5	W_IA_6	W_IA_7	W_IA_8	W_IP_1	W_IP_2	W_IP_3	W_IP_4	W_IP_5	W_IP_6	W_IP_7	W_IP_8
Metabolism; Xenobiotics Biodegradation and Metabolism; 1,1,1-Trichloro-2,2-bis(4-chlorophenyl)ethane (DDT) degradation	1,1,1-Trichloro-2,2-bis(4-chlorophenyl)ethane (DDT) degradation	0.000166225	4.7486e-05	1.66338e-05	1.03334e-05	0.000131754	0.000119574	2.73477e-05	3.06524e-05	0.000189855	5.90555e-05	0.000248921	0.000610948	2.4146e-05	3.17213e-05	0.000640491	2.96944e-05
Environmental Information Processing; Membrane Transport; ABC transporters	ABC transporters	2.85823	2.14327	2.46301	2.46446	2.60585	2.59552	2.48076	2.54682	2.51475	2.46533	2.61265	2.65139	3.06539	2.35242	2.95657	2.61399
Cellular Processes; Cell Communication; Adherens junction	Adherens junction	0	0	0	0	0	0	0	0	0	0	0	0	0	0	0	0
Organismal Systems; Endocrine System; Adipocytokine signaling pathway	Adipocytokine signaling pathway	0.0590869	0.042423	0.0496319	0.0489046	0.0492822	0.048954	0.0498666	0.0522863	0.0537487	0.0491902	0.0549882	0.0531968	0.154714	0.0476796	0.0927033	0.0604958
Human Diseases; Infectious Diseases; African trypanosomiasis	African trypanosomiasis	0.0261981	0.0293514	0.0284313	0.0284591	0.0283302	0.028804	0.0283313	0.026295	0.0203787	0.0284197	0.0242352	0.0256265	0.0157119	0.0287537	0.0130169	0.0239634
Metabolism; Amino Acid Metabolism; Alanine, aspartate and glutamate metabolism	Alanine, aspartate and glutamate metabolism	0.9062	0.879609	0.915562	0.91133	0.896341	0.897322	0.910571	0.919528	0.905012	0.910807	0.878727	0.871228	0.827829	0.892557	0.671146	0.874191
Organismal Systems; Excretory System; Aldosterone-regulated sodium reabsorption	Aldosterone-regulated sodium reabsorption	0	0	0	0	0	0	0	3.83155e-06	9.44551e-07	0	0	0	0	0	0	7.12666e-06
Metabolism; Lipid Metabolism; alpha-Linolenic acid metabolism	alpha-Linolenic acid metabolism	0.0511382	0.0601317	0.0566813	0.0567219	0.0548636	0.0547757	0.056224	0.0543238	0.046351	0.0567083	0.0492349	0.0526574	0.0584612	0.0581543	0.0253159	0.0518975
Human Diseases; Neurodegenerative Diseases; Alzheimer's disease	Alzheimer's disease	0.130447	0.13278	0.136887	0.137103	0.13537	0.136073	0.135649	0.133375	0.116857	0.135371	0.130442	0.126697	0.0988924	0.133638	0.113354	0.123602
Unclassified; Metabolism; Amino acid metabolism	Amino acid metabolism	0.178849	0.17737	0.179736	0.177108	0.174252	0.175825	0.178542	0.197713	0.239785	0.178819	0.184934	0.174247	0.187612	0.171061	0.0965017	0.168399
Metabolism; Amino Acid Metabolism; Amino acid related enzymes	Amino acid related enzymes	1.23742	1.26418	1.25262	1.2473	1.23121	1.23186	1.2517	1.255	1.26263	1.2494	1.30073	1.24706	1.25309	1.2583	1.5844	1.27919
Metabolism; Carbohydrate Metabolism; Amino sugar and nucleotide sugar metabolism	Amino sugar and nucleotide sugar metabolism	0.949238	0.899192	0.929835	0.933322	0.928217	0.922586	0.928027	0.952018	0.983688	0.927543	0.99952	0.951672	0.911841	0.915427	1.24433	0.983705
Genetic Information Processing; Translation; Aminoacyl-tRNA biosynthesis	Aminoacyl-tRNA biosynthesis	0.75173	0.804099	0.727269	0.726894	0.73249	0.729949	0.735744	0.739758	0.84979	0.733441	0.880094	0.827725	0.906676	0.771389	1.60739	0.876357
Metabolism; Xenobiotics Biodegradation and Metabolism; Aminobenzoate degradation	Aminobenzoate degradation	0.314199	0.331357	0.324993	0.318266	0.321655	0.328374	0.324145	0.320868	0.341403	0.324822	0.300942	0.314261	0.404272	0.315501	0.183382	0.275306
Human Diseases; Infectious Diseases; Amoebiasis	Amoebiasis	0.0161838	0.0242819	0.0200138	0.0195706	0.018402	0.018668	0.0200205	0.017947	0.0150448	0.020257	0.016164	0.0192519	0.0115293	0.0220313	0.0063911	0.0159245
Human Diseases; Neurodegenerative Diseases; Amyotrophic lateral sclerosis (ALS)	Amyotrophic lateral sclerosis (ALS)	0.0553485	0.0610807	0.0574731	0.0577914	0.061305	0.0619332	0.0579195	0.0545364	0.0465172	0.057468	0.0599395	0.0586459	0.033918	0.0580099	0.0800698	0.0521505
Organismal Systems; Immune System; Antigen processing and presentation	Antigen processing and presentation	0.027486	0.0296975	0.0282725	0.0282378	0.0275158	0.0274488	0.0284367	0.0268956	0.0258193	0.0284637	0.0248996	0.0266891	0.0207245	0.0297579	0.0152656	0.0272642
Cellular Processes; Cell Growth and Death; Apoptosis	Apoptosis	0.00903726	0.00295493	0.00681071	0.00637917	0.008259	0.00893784	0.00681935	0.00708838	0.00621609	0.00634396	0.00727767	0.00737674	0.00262745	0.00394345	0.00637942	0.00340536
Metabolism; Lipid Metabolism; Arachidonic acid metabolism	Arachidonic acid metabolism	0.0952081	0.114823	0.105003	0.104974	0.102694	0.103239	0.104967	0.0999039	0.0949566	0.105359	0.0989733	0.100067	0.0656567	0.109314	0.0967651	0.0945316
Metabolism; Amino Acid Metabolism; Arginine and proline metabolism	Arginine and proline metabolism	1.1765	1.11668	1.13785	1.13588	1.16441	1.17309	1.14213	1.14667	1.18747	1.1415	1.14117	1.1611	1.03472	1.12126	1.08541	1.10707
Human Diseases; Cardiovascular Diseases; Arrhythmogenic right ventricular cardiomyopathy (ARVC)	Arrhythmogenic right ventricular cardiomyopathy (ARVC)	0	0	0	0	0	0	0	0	0	0	0	0	0	0	0	0
Metabolism; Carbohydrate Metabolism; Ascorbate and aldarate metabolism	Ascorbate and aldarate metabolism	0.150435	0.171251	0.145641	0.150446	0.159391	0.157777	0.147766	0.144642	0.151971	0.148614	0.18065	0.175891	0.117311	0.160013	0.342431	0.182155
Metabolism; Xenobiotics Biodegradation and Metabolism; Atrazine degradation	Atrazine degradation	0.0428666	0.0112542	0.0315743	0.0295837	0.0349117	0.0370739	0.0319265	0.0367848	0.0411012	0.0312033	0.0331552	0.0347847	0.0174844	0.0194476	0.0312885	0.0250455
Cellular Processes; Cell Motility; Bacterial chemotaxis	Bacterial chemotaxis	0.9044	0.942254	0.872366	0.904148	0.906232	0.888368	0.87804	0.865211	0.792063	0.873551	0.827734	0.826933	1.0648	0.942928	0.585623	0.928375
Human Diseases; Infectious Diseases; Bacterial invasion of epithelial cells	Bacterial invasion of epithelial cells	0.000645595	0.000174115	5.98817e-05	3.18614e-05	0.000244834	0.000152185	0.000155296	0.000459787	0.00574192	0.000446419	0.000529659	0.00328561	0.00895371	0.000194501	0.00107598	0.00143959
Cellular Processes; Cell Motility; Bacterial motility proteins	Bacterial motility proteins	2.56428	2.84202	2.67493	2.69676	2.63967	2.6358	2.67606	2.61515	2.40558	2.67621	2.39657	2.46674	2.62779	2.80321	1.41467	2.58885
Environmental Information Processing; Membrane Transport; Bacterial secretion system	Bacterial secretion system	0.811349	0.920052	0.83823	0.848009	0.858842	0.857951	0.841268	0.816609	0.794224	0.842371	0.826566	0.846803	0.778597	0.880337	0.755983	0.84102
Environmental Information Processing; Signaling Molecules and Interaction; Bacterial toxins	Bacterial toxins	0.11817	0.135923	0.119717	0.125728	0.12834	0.125438	0.120517	0.114464	0.100908	0.120969	0.12127	0.122138	0.0902096	0.130886	0.12147	0.115907
Genetic Information Processing; Transcription; Basal transcription factors	Basal transcription factors	0.00244833	0.000541772	2.74458e-05	4.04726e-05	0.000159765	0.000148561	0.00034087	9.4831e-05	0.0012487	0.000180169	0.000398648	0.000397217	0.0050814	0.000971673	0.00340852	0.00218788
Genetic Information Processing; Replication and Repair; Base excision repair	Base excision repair	0.393154	0.453536	0.410351	0.409923	0.407624	0.408398	0.41212	0.400238	0.405311	0.413178	0.427919	0.420928	0.357088	0.430496	0.549355	0.420538
Metabolism; Xenobiotics Biodegradation and Metabolism; Benzoate degradation	Benzoate degradation	0.442997	0.305673	0.417145	0.404746	0.423585	0.435546	0.4124	0.422397	0.373721	0.409124	0.380007	0.380348	0.583955	0.342127	0.281679	0.322093
Metabolism; Metabolism of Other Amino Acids; beta-Alanine metabolism	beta-Alanine metabolism	0.385942	0.338343	0.370709	0.369342	0.380789	0.383995	0.36887	0.373501	0.377459	0.367709	0.370101	0.366535	0.492355	0.343021	0.340472	0.337582
Metabolism; Biosynthesis of Other Secondary Metabolites; beta-Lactam resistance	beta-Lactam resistance	0.0390478	0.051277	0.0463027	0.0450899	0.0430151	0.0439126	0.0461337	0.0434939	0.0428524	0.0466528	0.0378566	0.0420324	0.0257549	0.0481337	0.0161249	0.0394318
Metabolism; Biosynthesis of Other Secondary Metabolites; Betalain biosynthesis	Betalain biosynthesis	0.00106062	0.00026621	8.64958e-05	0.000148112	0.00110487	0.00136362	0.000244176	8.90836e-05	0.000527059	0.000224211	0.000622303	0.00117048	9.83728e-05	0.000141911	0.00240901	0.000121153
Organismal Systems; Digestive System; Bile secretion	Bile secretion	0.00815787	0.00501985	0.00820213	0.00849666	0.00764795	0.00734232	0.00781949	0.00860854	0.00674409	0.00779332	0.00782791	0.00593002	0.00403776	0.00654794	0.00335966	0.00570252
Unclassified; Metabolism; Biosynthesis and biodegradation of secondary metabolites	Biosynthesis and biodegradation of secondary metabolites	0.0639568	0.0522871	0.0560967	0.0584898	0.0653168	0.0644672	0.0564203	0.0579063	0.062313	0.0570015	0.059669	0.0639338	0.0485023	0.0537308	0.0471754	0.0574563
Metabolism; Metabolism of Terpenoids and Polyketides; Biosynthesis of 12-, 14- and 16-membered macrolides	Biosynthesis of 12-, 14- and 16-membered macrolides	7.29243e-05	4.31691e-06	0	4.30559e-06	0	2.41563e-06	1.75807e-05	3.54419e-05	0.00238405	0.000151142	4.67897e-05	0.000497025	5.36579e-06	2.50431e-05	2.86787e-05	0.000570133
Metabolism; Metabolism of Terpenoids and Polyketides; Biosynthesis of ansamycins	Biosynthesis of ansamycins	0.0444946	0.039735	0.0370426	0.037587	0.0394888	0.0389593	0.0379498	0.0415877	0.0518823	0.0373611	0.0482776	0.0419971	0.0645406	0.0396541	0.0807231	0.0483817
Metabolism; Metabolism of Terpenoids and Polyketides; Biosynthesis of siderophore group nonribosomal peptides	Biosynthesis of siderophore group nonribosomal peptides	0.0909592	0.0835437	0.0936774	0.0966287	0.0942072	0.0916515	0.091987	0.0923347	0.0702604	0.0922907	0.0856017	0.082358	0.0588833	0.0889573	0.0473124	0.0936087
Metabolism; Metabolism of Terpenoids and Polyketides; Biosynthesis of type II polyketide backbone	Biosynthesis of type II polyketide backbone	0	0	0	0	0	0	0	2.87367e-06	0	0	0	0	0	0	0	0
Metabolism; Metabolism of Terpenoids and Polyketides; Biosynthesis of type II polyketide products	Biosynthesis of type II polyketide products	2.5738e-05	1.94261e-05	8.3169e-07	3.44447e-06	1.03743e-06	1.08703e-05	0	1.62841e-05	0.000145461	4.00376e-06	3.74317e-05	8.36777e-05	0	0	3.18652e-06	1.90044e-05
Metabolism; Lipid Metabolism; Biosynthesis of unsaturated fatty acids	Biosynthesis of unsaturated fatty acids	0.341561	0.356275	0.35947	0.358198	0.351252	0.352897	0.357208	0.360441	0.35084	0.357703	0.332252	0.32693	0.252696	0.352916	0.172856	0.319267
Metabolism; Metabolism of Terpenoids and Polyketides; Biosynthesis of vancomycin group antibiotics	Biosynthesis of vancomycin group antibiotics	0.0463027	0.0544758	0.0467277	0.045542	0.0455059	0.0464852	0.0475001	0.0461846	0.0544836	0.0474395	0.0430053	0.0476388	0.0629049	0.0508926	0.0266436	0.0431888
Metabolism; Metabolism of Cofactors and Vitamins; Biotin metabolism	Biotin metabolism	0.141276	0.159321	0.144743	0.145642	0.146088	0.145713	0.145503	0.143774	0.156219	0.145485	0.139604	0.145018	0.130982	0.151841	0.0808367	0.139487
Metabolism; Xenobiotics Biodegradation and Metabolism; Bisphenol degradation	Bisphenol degradation	0.0504218	0.0481631	0.0382827	0.0394341	0.048694	0.0494637	0.0399687	0.0444135	0.0740603	0.0397814	0.0573941	0.054821	0.0380819	0.0402618	0.0932928	0.0479957
Human Diseases; Cancers; Bladder cancer	Bladder cancer	0.023561	0.028642	0.0281028	0.0280475	0.0254544	0.0253823	0.0275597	0.0261829	0.0194181	0.0278512	0.0297582	0.0263917	0.0180049	0.0284223	0.0567084	0.0299165
Metabolism; Carbohydrate Metabolism; Butanoate metabolism	Butanoate metabolism	0.984343	0.894171	1.0014	0.989849	0.972512	0.978192	0.989173	0.994084	0.894509	0.98664	0.923511	0.90738	1.27085	0.929838	0.675948	0.888623
Metabolism; Biosynthesis of Other Secondary Metabolites; Butirosin and neomycin biosynthesis	Butirosin and neomycin biosynthesis	0.044161	0.0543017	0.0463418	0.0451545	0.0430057	0.0439645	0.0467578	0.0467593	0.0548538	0.0469451	0.0427442	0.0440165	0.0444028	0.0500361	0.0227443	0.0414344
Metabolism; Carbohydrate Metabolism; C5-Branched dibasic acid metabolism	C5-Branched dibasic acid metabolism	0.271169	0.291393	0.273487	0.274469	0.276731	0.275202	0.27427	0.272367	0.289517	0.274519	0.261001	0.270199	0.296501	0.282233	0.157235	0.256251
Metabolism; Biosynthesis of Other Secondary Metabolites; Caffeine metabolism	Caffeine metabolism	0.000242366	0.000252539	6.23768e-05	5.33894e-05	0.000127604	0.000298331	5.66489e-05	0.000191578	0.00101067	6.80639e-05	0.000743956	0.000483919	4.47149e-05	7.59641e-05	0.000312279	9.0271e-05
Environmental Information Processing; Signal Transduction; Calcium signaling pathway	Calcium signaling pathway	0.00042146	0.000182749	5.32282e-05	4.65004e-05	0.000278032	0.000178757	0.000139669	0.000371661	0.00329932	0.000295277	0.000423915	0.00249117	4.11377e-05	0.000133563	0.000458859	0.000680596
Environmental Information Processing; Signaling Molecules and Interaction; CAM ligands	CAM ligands	0	0	0	0	0	0	0	0	0	0	1.31011e-05	0	0	0	0	0
Metabolism; Xenobiotics Biodegradation and Metabolism; Caprolactam degradation	Caprolactam degradation	0.194485	0.186519	0.188	0.188955	0.200216	0.201384	0.187689	0.190502	0.196662	0.187194	0.186581	0.188469	0.295544	0.179218	0.13021	0.170938
Organismal Systems; Digestive System; Carbohydrate digestion and absorption	Carbohydrate digestion and absorption	0.0230806	0.00778555	0.0205561	0.0196593	0.0175025	0.0176003	0.0197617	0.0220209	0.0166496	0.0196384	0.0167778	0.0165087	0.023495	0.0151394	0.0105824	0.0185495
Unclassified; Metabolism; Carbohydrate metabolism	Carbohydrate metabolism	0.103358	0.0817983	0.0867627	0.086613	0.0908106	0.0909401	0.088464	0.0955858	0.125164	0.0880006	0.0921906	0.0979583	0.101066	0.0851182	0.0678718	0.0942026
Metabolism; Energy Metabolism; Carbon fixation in photosynthetic organisms	Carbon fixation in photosynthetic organisms	0.392796	0.38728	0.373075	0.375412	0.379404	0.375095	0.376001	0.384649	0.446818	0.37608	0.440353	0.429289	0.459066	0.384443	0.720634	0.444957
Metabolism; Energy Metabolism; Carbon fixation pathways in prokaryotes	Carbon fixation pathways in prokaryotes	0.968849	1.01918	0.994918	0.996215	0.988906	0.985298	0.992069	0.993113	1.00038	0.992233	0.965924	0.963153	1.24173	0.99903	0.778857	0.948741
Organismal Systems; Circulatory System; Cardiac muscle contraction	Cardiac muscle contraction	0.0752622	0.0883096	0.0850545	0.0850286	0.0821584	0.0828659	0.0842642	0.0800958	0.064306	0.0844113	0.0727701	0.0735063	0.0469363	0.0861174	0.0334075	0.0721016
Metabolism; Metabolism of Terpenoids and Polyketides; Carotenoid biosynthesis	Carotenoid biosynthesis	0.005657	0.00439965	0.00117767	0.00107037	0.00447445	0.00427929	0.00221712	0.00455859	0.0371605	0.00301383	0.0132667	0.0272759	0.0120301	0.00202432	0.055694	0.0131249
Cellular Processes; Cell Growth and Death; Cell cycle	Cell cycle	0	0	0	0	0	0	0	0	0	2.00188e-06	0	0	0	0	0	0
Cellular Processes; Cell Growth and Death; Cell cycle - Caulobacter	Cell cycle - Caulobacter	0.39041	0.391994	0.374045	0.374104	0.382021	0.381813	0.378134	0.371709	0.400944	0.375659	0.385591	0.399939	0.444556	0.386502	0.428978	0.39404
Cellular Processes; Cell Growth and Death; Cell cycle - yeast	Cell cycle - yeast	0	0	0	0	0	0	0	0	0	0	0	0	0	0	0	0
Unclassified; Cellular Processes and Signaling; Cell division	Cell division	0.0863199	0.0923445	0.0916015	0.0910693	0.0898282	0.0897963	0.0912095	0.0890482	0.0806278	0.0909684	0.0822132	0.0850911	0.107949	0.0913456	0.0451339	0.0804743
Unclassified; Cellular Processes and Signaling; Cell motility and secretion	Cell motility and secretion	0.354072	0.383363	0.365557	0.36773	0.365706	0.36504	0.366204	0.366043	0.3709	0.365916	0.35038	0.346855	0.35372	0.374781	0.242278	0.345668
Environmental Information Processing; Signaling Molecules and Interaction; Cellular antigens	Cellular antigens	0.105938	0.13746	0.124797	0.124084	0.117921	0.118573	0.123828	0.116384	0.104654	0.124825	0.105244	0.110749	0.0781509	0.129778	0.0451148	0.104402
Human Diseases; Infectious Diseases; Chagas disease (American trypanosomiasis)	Chagas disease (American trypanosomiasis)	0.0402231	0.052498	0.0482222	0.0478162	0.0448503	0.0455117	0.047796	0.0436347	0.0329346	0.0481022	0.0386782	0.0408105	0.0270284	0.0504109	0.0154015	0.0395173
Genetic Information Processing; Folding, Sorting and Degradation; Chaperones and folding catalysts	Chaperones and folding catalysts	1.16267	1.26564	1.23111	1.23192	1.20873	1.20618	1.2283	1.19727	1.12266	1.23037	1.15577	1.17909	1.04436	1.25135	0.936	1.1749
Metabolism; Xenobiotics Biodegradation and Metabolism; Chloroalkane and chloroalkene degradation	Chloroalkane and chloroalkene degradation	0.289315	0.264447	0.288225	0.282884	0.280662	0.285688	0.286785	0.292798	0.302037	0.28669	0.287952	0.280262	0.253143	0.270196	0.298856	0.274091
Metabolism; Xenobiotics Biodegradation and Metabolism; Chlorocyclohexane and chlorobenzene degradation	Chlorocyclohexane and chlorobenzene degradation	0.0867928	0.106677	0.0935626	0.0917341	0.0945485	0.0974394	0.0946026	0.0893959	0.104283	0.0955467	0.0849148	0.0984654	0.0605798	0.096997	0.0492233	0.077892
Organismal Systems; Nervous System; Cholinergic synapse	Cholinergic synapse	0	0	0	0	0	0	0	0	0	0	0	0	0	0	0	0
Genetic Information Processing; Replication and Repair; Chromosome	Chromosome	1.40238	1.53881	1.47145	1.46879	1.44811	1.44557	1.47321	1.4182	1.35585	1.47538	1.39739	1.45403	1.35055	1.51465	1.31739	1.43365
Human Diseases; Cancers; Chronic myeloid leukemia	Chronic myeloid leukemia	1.82311e-05	2.87794e-06	1.66338e-06	0	0	1.20782e-06	0	5.74733e-06	5.00612e-05	4.00376e-06	1.87159e-05	0	0	8.3477e-07	0	1.18778e-06
Organismal Systems; Environmental Adaptation; Circadian rhythm - plant	Circadian rhythm - plant	0.000440763	0.000724522	0.000138061	0.00013089	0.000517679	0.00059183	0.000189481	0.00034005	0.00195522	0.000171161	0.00069623	0.000695634	3.04061e-05	0.000107685	0.000305906	0.00014966
Metabolism; Carbohydrate Metabolism; Citrate cycle (TCA cycle)	Citrate cycle (TCA cycle)	0.718723	0.768999	0.750995	0.74893	0.734349	0.734579	0.74784	0.742823	0.727886	0.747805	0.728492	0.707971	0.709008	0.750996	0.616645	0.709878
Metabolism; Biosynthesis of Other Secondary Metabolites; Clavulanic acid biosynthesis	Clavulanic acid biosynthesis	0	1.94261e-05	0	0	0	0	0	3.83155e-06	7.55641e-06	0	0	6.04899e-06	0	1.66954e-06	0	0
Human Diseases; Cancers; Colorectal cancer	Colorectal cancer	0.0087402	0.00287722	0.0067974	0.00634558	0.00806811	0.00881706	0.00675879	0.00707688	0.0061103	0.00632594	0.00714011	0.00699565	0.00260777	0.00390923	0.00552118	0.00339229
Organismal Systems; Immune System; Complement and coagulation cascades	Complement and coagulation cascades	0	0	0	0	0	0	0	0	0	0	0	0	0	0	0	0
Metabolism; Metabolism of Other Amino Acids; Cyanoamino acid metabolism	Cyanoamino acid metabolism	0.209412	0.21004	0.2138	0.21096	0.211922	0.214665	0.214068	0.205795	0.194826	0.214222	0.208997	0.214762	0.159384	0.210699	0.257158	0.205721
Metabolism; Amino Acid Metabolism; Cysteine and methionine metabolism	Cysteine and methionine metabolism	0.901759	0.976238	0.937028	0.93422	0.916167	0.918076	0.937476	0.91779	0.905482	0.939175	0.881624	0.895016	0.862549	0.961018	0.717561	0.893808
Metabolism; Enzyme Families; Cytochrome P450	Cytochrome P450	1.93035e-05	2.01456e-05	0	1.37779e-05	4.14973e-06	1.44938e-05	0	0	1.70019e-05	1.50141e-05	1.31011e-05	1.8147e-05	1.7886e-06	0	6.37304e-06	0
Environmental Information Processing; Signaling Molecules and Interaction; Cytokine receptors	Cytokine receptors	0	0	0	0	0	0	0	0	0	0	0	0	0	0	0	0
Environmental Information Processing; Signaling Molecules and Interaction; Cytokine-cytokine receptor interaction	Cytokine-cytokine receptor interaction	0	0	0	0	0	0	0	0	0	0	0	0	0	0	0	0
Cellular Processes; Cell Motility; Cytoskeleton proteins	Cytoskeleton proteins	0.196192	0.215521	0.199567	0.199763	0.198129	0.197234	0.200599	0.195118	0.209133	0.201684	0.197029	0.214884	0.212326	0.209354	0.207026	0.208677
Organismal Systems; Immune System; Cytosolic DNA-sensing pathway	Cytosolic DNA-sensing pathway	0	0	0	0	0	0	0	0	0	0	0	0	0	0	0	0
Metabolism; Metabolism of Other Amino Acids; D-Alanine metabolism	D-Alanine metabolism	0.0731581	0.0691483	0.0715985	0.0713377	0.070452	0.0700014	0.0714049	0.0715581	0.0713816	0.0712569	0.0672873	0.0694041	0.0752963	0.0708019	0.0404561	0.0698223
Metabolism; Metabolism of Other Amino Acids; D-Arginine and D-ornithine metabolism	D-Arginine and D-ornithine metabolism	0.00638195	0.0017836	0.00622271	0.00568597	0.00533552	0.00556803	0.00591492	0.00674066	0.00556246	0.00575941	0.00550902	0.00385623	0.00234664	0.00341755	0.00237821	0.00308228
Metabolism; Metabolism of Other Amino Acids; D-Glutamine and D-glutamate metabolism	D-Glutamine and D-glutamate metabolism	0.0825396	0.0743681	0.0742832	0.075099	0.0789154	0.077944	0.0752912	0.0749021	0.0831006	0.0749384	0.0737181	0.0815	0.08211	0.0754941	0.0551704	0.0766152
Human Diseases; Cardiovascular Diseases; Dilated cardiomyopathy (DCM)	Dilated cardiomyopathy (DCM)	0	0	0	0	0	0	0	0	0	0	0	0	0	0	0	0
Metabolism; Xenobiotics Biodegradation and Metabolism; Dioxin degradation	Dioxin degradation	0.0518921	0.0185577	0.0475818	0.0457624	0.0431032	0.0438268	0.0457322	0.0514942	0.0412939	0.0450543	0.04352	0.0368202	0.0249903	0.0313181	0.025968	0.0348019
Genetic Information Processing; Replication and Repair; DNA repair and recombination proteins	DNA repair and recombination proteins	2.27148	2.48036	2.32115	2.32436	2.30896	2.30141	2.32967	2.2916	2.33257	2.33115	2.41193	2.38835	2.25801	2.41106	2.9871	2.42255
Genetic Information Processing; Replication and Repair; DNA replication	DNA replication	0.450963	0.465044	0.442782	0.445425	0.445743	0.441841	0.445315	0.441805	0.460512	0.44464	0.5112	0.480749	0.485409	0.460298	0.88948	0.51579
Genetic Information Processing; Replication and Repair; DNA replication proteins	DNA replication proteins	0.797862	0.841531	0.794984	0.799067	0.800562	0.794557	0.800007	0.787311	0.824052	0.799514	0.908972	0.866428	0.848672	0.828317	1.56867	0.916814
Metabolism; Xenobiotics Biodegradation and Metabolism; Drug metabolism - cytochrome P450	Drug metabolism - cytochrome P450	0.203987	0.245642	0.219981	0.217607	0.220689	0.224273	0.221693	0.205113	0.198819	0.222246	0.192578	0.225738	0.163479	0.230028	0.110286	0.195483
Metabolism; Xenobiotics Biodegradation and Metabolism; Drug metabolism - other enzymes	Drug metabolism - other enzymes	0.227076	0.228949	0.223757	0.224624	0.220278	0.21869	0.224365	0.219556	0.207231	0.223872	0.261493	0.235201	0.223617	0.231517	0.513063	0.276092
Environmental Information Processing; Signaling Molecules and Interaction; ECM-receptor interaction	ECM-receptor interaction	0	0	0	0	0	0	0	0	0	0	1.31011e-05	0	0	0	0	0
Unclassified; Cellular Processes and Signaling; Electron transfer carriers	Electron transfer carriers	0.0275761	0.0137386	0.0229854	0.0229092	0.0218514	0.0208711	0.0221731	0.0258448	0.0243581	0.0224291	0.0226078	0.0237675	0.0704653	0.0195244	0.0156649	0.0325593
Organismal Systems; Excretory System; Endocrine and other factor-regulated calcium reabsorption	Endocrine and other factor-regulated calcium reabsorption	0	0	0	0	0	0	0	3.83155e-06	0	0	0	0	0	0	0	7.12666e-06
Cellular Processes; Transport and Catabolism; Endocytosis	Endocytosis	5.25484e-05	0.000225918	1.16437e-05	3.44447e-06	6.53583e-05	4.5897e-05	7.81363e-06	0.000161883	0.000564841	1.00094e-05	0.000323785	7.46042e-05	1.7886e-06	5.34253e-05	2.54922e-05	2.37555e-05
Unclassified; Metabolism; Energy metabolism	Energy metabolism	0.881664	0.804303	0.872796	0.866992	0.856022	0.860104	0.867694	0.893107	0.873442	0.865274	0.860056	0.814252	0.979438	0.835855	0.781731	0.848124
Human Diseases; Infectious Diseases; Epithelial cell signaling in Helicobacter pylori infection	Epithelial cell signaling in Helicobacter pylori infection	0.032743	0.0139228	0.0231202	0.023462	0.0259296	0.0254547	0.0235718	0.0266829	0.030151	0.0231207	0.0325329	0.0311029	0.041888	0.0200253	0.0742406	0.0356119
Environmental Information Processing; Signal Transduction; ErbB signaling pathway	ErbB signaling pathway	0	0	0	0	0	0	0	0	0	0	0	0	0	0	0	0
Metabolism; Lipid Metabolism; Ether lipid metabolism	Ether lipid metabolism	0.0155243	0.0245186	0.0199448	0.0195078	0.0180731	0.0182791	0.0198066	0.0178579	0.0147511	0.0200358	0.0158776	0.0171096	0.0203524	0.021977	0.00639322	0.0161656
Metabolism; Xenobiotics Biodegradation and Metabolism; Ethylbenzene degradation	Ethylbenzene degradation	0.074918	0.0703153	0.0777971	0.0770951	0.0758809	0.0762011	0.0764916	0.0790823	0.0740906	0.076669	0.0725848	0.0705584	0.0759697	0.0718195	0.0407429	0.067379
Organismal Systems; Digestive System; Fat digestion and absorption	Fat digestion and absorption	0	0	0	0	0	0	0	0	0	0	0	0	0	0	0	0
Metabolism; Lipid Metabolism; Fatty acid biosynthesis	Fatty acid biosynthesis	0.482784	0.533446	0.491214	0.488205	0.487985	0.490063	0.493398	0.500178	0.55595	0.492962	0.474693	0.477687	0.489377	0.507653	0.271552	0.461466
Metabolism; Lipid Metabolism; Fatty acid elongation in mitochondria	Fatty acid elongation in mitochondria	2.14483e-06	5.89978e-05	1.66338e-06	1.72224e-06	0	1.3286e-05	1.95341e-06	0.000113031	0.000555396	3.00282e-06	0.000192773	3.22613e-05	0	1.25216e-05	1.06217e-06	3.80089e-05
Metabolism; Lipid Metabolism; Fatty acid metabolism	Fatty acid metabolism	0.594353	0.535397	0.572435	0.568256	0.58282	0.587827	0.570691	0.574916	0.575192	0.568461	0.563339	0.571059	0.90301	0.540212	0.522573	0.537394
Organismal Systems; Immune System; Fc epsilon RI signaling pathway	Fc epsilon RI signaling pathway	0	0	0	0	0	0	0	0	0	0	0	0	0	0	0	0
Organismal Systems; Immune System; Fc gamma R-mediated phagocytosis	Fc gamma R-mediated phagocytosis	5.25484e-05	0.000225918	1.16437e-05	3.44447e-06	6.53583e-05	4.5897e-05	7.81363e-06	0.000161883	0.000564841	1.00094e-05	0.000323785	7.46042e-05	1.7886e-06	5.34253e-05	2.54922e-05	2.37555e-05
Cellular Processes; Cell Motility; Flagellar assembly	Flagellar assembly	0.959647	1.03235	0.986627	0.988944	0.961177	0.961997	0.986421	0.96508	0.850046	0.982702	0.875924	0.880588	0.998811	1.03433	0.522431	0.9952
Metabolism; Biosynthesis of Other Secondary Metabolites; Flavone and flavonol biosynthesis	Flavone and flavonol biosynthesis	6.11277e-05	9.4972e-05	4.15845e-06	2.58336e-06	4.87593e-05	8.45471e-06	9.76704e-06	4.21471e-05	7.3675e-05	1.20113e-05	2.7138e-05	0.000133078	1.7886e-06	1.0852e-05	2.12435e-05	2.37555e-05
Metabolism; Biosynthesis of Other Secondary Metabolites; Flavonoid biosynthesis	Flavonoid biosynthesis	0.00765705	0.0037701	0.00644726	0.00583408	0.00597769	0.00615745	0.00631439	0.00910856	0.0176659	0.00653013	0.00816106	0.011119	0.0202111	0.00398269	0.00435279	0.00530342
Metabolism; Xenobiotics Biodegradation and Metabolism; Fluorobenzoate degradation	Fluorobenzoate degradation	0.0646614	0.0350986	0.0580112	0.0554793	0.0627771	0.0667162	0.058151	0.0585931	0.0514478	0.0573398	0.0511926	0.0565661	0.0263612	0.0437528	0.0425762	0.0366987
Cellular Processes; Cell Communication; Focal adhesion	Focal adhesion	0	0	0	0	0	0	0	0	0	0	1.31011e-05	0	0	0	0	0
Metabolism; Metabolism of Cofactors and Vitamins; Folate biosynthesis	Folate biosynthesis	0.451734	0.507529	0.474114	0.476597	0.476945	0.4759	0.474489	0.470153	0.486853	0.476394	0.461453	0.47225	0.375819	0.486267	0.336766	0.440729
Metabolism; Carbohydrate Metabolism; Fructose and mannose metabolism	Fructose and mannose metabolism	0.536324	0.462651	0.506108	0.506147	0.505604	0.503103	0.505305	0.528885	0.555105	0.503731	0.585899	0.537187	0.520267	0.485148	0.929356	0.564663
Unclassified; Poorly Characterized; Function unknown	Function unknown	2.04183	1.95609	2.06374	2.08153	2.08726	2.0769	2.05234	2.05106	1.86366	2.05272	2.01038	1.9804	1.709	2.01129	1.74368	2.02187
Environmental Information Processing; Signaling Molecules and Interaction; G protein-coupled receptors	G protein-coupled receptors	3.21725e-06	0	0	0	0	0	0	1.91578e-06	4.72275e-06	0	0	0	0	0	4.67356e-05	0
Metabolism; Carbohydrate Metabolism; Galactose metabolism	Galactose metabolism	0.361796	0.306375	0.351114	0.343929	0.333735	0.338327	0.348882	0.356647	0.340313	0.347324	0.3605	0.337002	0.345049	0.329155	0.470904	0.385664
Organismal Systems; Digestive System; Gastric acid secretion	Gastric acid secretion	0	0	0	0	0	0	0	3.83155e-06	0	0	0	0	0	0	0	7.12666e-06
Unclassified; Poorly Characterized; General function prediction only	General function prediction only	3.31853	3.43386	3.30607	3.30949	3.3468	3.35267	3.32019	3.30758	3.48493	3.32462	3.34287	3.42064	3.52663	3.36807	3.44423	3.3477
Metabolism; Metabolism of Terpenoids and Polyketides; Geraniol degradation	Geraniol degradation	0.306744	0.284433	0.298282	0.297915	0.313641	0.316447	0.297566	0.295921	0.287231	0.296725	0.283573	0.29234	0.486143	0.280479	0.203179	0.265649
Unclassified; Cellular Processes and Signaling; Germination	Germination	5.57657e-05	2.08651e-05	1.66338e-06	3.78892e-05	0.000299818	5.9183e-05	0.000238316	0.000107284	0.000241805	0.000157148	0.000274188	0.000414356	4.73978e-05	8.3477e-06	4.56735e-05	0.000103337
Human Diseases; Cancers; Glioma	Glioma	0	0	0	0	0	0	0	0	0	0	0	0	0	0	0	0
Organismal Systems; Nervous System; Glutamatergic synapse	Glutamatergic synapse	0.0745834	0.0679036	0.0698686	0.0692503	0.0737604	0.0757579	0.0703227	0.0708464	0.077728	0.0705993	0.0688679	0.0733309	0.0507201	0.067022	0.0456597	0.0626968
Metabolism; Metabolism of Other Amino Acids; Glutathione metabolism	Glutathione metabolism	0.520745	0.613085	0.560542	0.561609	0.560205	0.56159	0.562229	0.530959	0.500577	0.563682	0.519516	0.556945	0.425602	0.58584	0.419075	0.521319
Environmental Information Processing; Signaling Molecules and Interaction; Glycan bindng proteins	Glycan bindng proteins	0	0	0	0	0	0	0	0	0	0	0	0	0	0	0	0
Unclassified; Metabolism; Glycan biosynthesis and metabolism	Glycan biosynthesis and metabolism	0.113869	0.122226	0.121485	0.121758	0.118316	0.117769	0.121109	0.114976	0.0949897	0.121045	0.104782	0.110539	0.112889	0.123927	0.0574912	0.114579
Metabolism; Lipid Metabolism; Glycerolipid metabolism	Glycerolipid metabolism	0.340669	0.300479	0.328785	0.324993	0.323823	0.326827	0.328607	0.328145	0.317982	0.327976	0.355912	0.3407	0.349546	0.316006	0.576468	0.355934
Metabolism; Lipid Metabolism; Glycerophospholipid metabolism	Glycerophospholipid metabolism	0.498334	0.542462	0.516944	0.518694	0.515937	0.514431	0.517023	0.510353	0.498557	0.516881	0.544897	0.524353	0.498606	0.529038	0.702986	0.54704
Metabolism; Amino Acid Metabolism; Glycine, serine and threonine metabolism	Glycine, serine and threonine metabolism	0.961341	0.919732	0.955912	0.954169	0.95487	0.960773	0.953023	0.957025	0.919374	0.951206	0.904868	0.900452	0.821591	0.934056	0.584265	0.875799
Metabolism; Carbohydrate Metabolism; Glycolysis / Gluconeogenesis	Glycolysis / Gluconeogenesis	0.950428	0.909325	0.944243	0.936989	0.920127	0.921828	0.941588	0.957146	0.982231	0.941702	1.04377	0.977502	0.940827	0.922732	1.62148	1.02748
Metabolism; Glycan Biosynthesis and Metabolism; Glycosaminoglycan biosynthesis - chondroitin sulfate	Glycosaminoglycan biosynthesis - chondroitin sulfate	0	7.19485e-07	0	0	0	0	0	0	0	0	0	0	0	0	0	1.18778e-06
Metabolism; Glycan Biosynthesis and Metabolism; Glycosaminoglycan degradation	Glycosaminoglycan degradation	0.0335162	0.0422906	0.0369013	0.0371693	0.034921	0.0348262	0.0360834	0.0461932	0.0625973	0.036219	0.0436389	0.0314628	0.0289574	0.0371389	0.0131848	0.0393997
Metabolism; Glycan Biosynthesis and Metabolism; Glycosphingolipid biosynthesis - ganglio series	Glycosphingolipid biosynthesis - ganglio series	0.0325146	0.0338288	0.0365303	0.0366466	0.033894	0.0336945	0.0356536	0.0352455	0.0270264	0.0358487	0.0307212	0.0298145	0.0200046	0.0355337	0.0121056	0.0351083
Metabolism; Glycan Biosynthesis and Metabolism; Glycosphingolipid biosynthesis - globo series	Glycosphingolipid biosynthesis - globo series	0.0839563	0.0672661	0.0891464	0.0868843	0.0786042	0.0796954	0.0868046	0.0872062	0.0600073	0.0863891	0.0714123	0.0651587	0.0550843	0.0791863	0.0312024	0.0755782
Metabolism; Glycan Biosynthesis and Metabolism; Glycosphingolipid biosynthesis - lacto and neolacto series	Glycosphingolipid biosynthesis - lacto and neolacto series	0	0	0	0	0	0	0	0	1.32237e-05	0	0	1.8147e-05	0	3.33908e-06	4.99222e-05	0
Metabolism; Glycan Biosynthesis and Metabolism; Glycosylphosphatidylinositol(GPI)-anchor biosynthesis	Glycosylphosphatidylinositol(GPI)-anchor biosynthesis	0	0	0	0	0	2.41563e-06	0	2.87367e-06	1.8891e-06	0	1.87159e-06	0	0	1.66954e-06	0	0
Metabolism; Glycan Biosynthesis and Metabolism; Glycosyltransferases	Glycosyltransferases	0.381918	0.401755	0.392143	0.389729	0.388601	0.390493	0.392978	0.391584	0.400202	0.393546	0.36463	0.387523	0.380657	0.395296	0.207343	0.360889
Metabolism; Carbohydrate Metabolism; Glyoxylate and dicarboxylate metabolism	Glyoxylate and dicarboxylate metabolism	0.65082	0.622022	0.654578	0.647071	0.651901	0.658076	0.652216	0.651812	0.634596	0.651869	0.603359	0.623297	0.693422	0.628255	0.367933	0.601674
Organismal Systems; Endocrine System; GnRH signaling pathway	GnRH signaling pathway	5.25484e-05	0.000225918	1.16437e-05	3.44447e-06	6.53583e-05	4.5897e-05	7.81363e-06	0.000161883	0.000564841	1.00094e-05	0.000323785	7.46042e-05	1.7886e-06	5.34253e-05	2.54922e-05	2.37555e-05
Environmental Information Processing; Signaling Molecules and Interaction; GTP-binding proteins	GTP-binding proteins	0	0	0	0	0	0	0	0	0	0	0	0	0	0	0	0
Environmental Information Processing; Signal Transduction; Hedgehog signaling pathway	Hedgehog signaling pathway	0	0	0	0	0	0	0	0	0	0	0	0	0	0	0	0
Organismal Systems; Immune System; Hematopoietic cell lineage	Hematopoietic cell lineage	1.82311e-05	1.00728e-05	0	0	0	0	0	0	1.70019e-05	4.00376e-06	8.42214e-06	8.06532e-06	0	0	6.37304e-06	0
Human Diseases; Infectious Diseases; Hepatitis C	Hepatitis C	0	0	0	0	0	0	0	0	0	2.00188e-06	0	0	0	0	0	0
Metabolism; Amino Acid Metabolism; Histidine metabolism	Histidine metabolism	0.498068	0.513628	0.490125	0.489267	0.49384	0.495727	0.492471	0.488809	0.516233	0.493161	0.483655	0.498325	0.510989	0.502624	0.441615	0.488363
Genetic Information Processing; Replication and Repair; Homologous recombination	Homologous recombination	0.681866	0.712887	0.684172	0.686355	0.680832	0.675668	0.686277	0.677836	0.686006	0.685819	0.722136	0.706228	0.711529	0.707161	0.959002	0.734818
Human Diseases; Neurodegenerative Diseases; Huntington's disease	Huntington's disease	0.155281	0.177965	0.170605	0.170619	0.167344	0.168085	0.16984	0.16154	0.134741	0.169691	0.155558	0.157058	0.101298	0.173535	0.1221	0.150831
Human Diseases; Cardiovascular Diseases; Hypertrophic cardiomyopathy (HCM)	Hypertrophic cardiomyopathy (HCM)	0.0151028	0.0235883	0.0198591	0.0195104	0.0176696	0.0179808	0.0197431	0.0173943	0.0128667	0.0199397	0.0149474	0.0163363	0.0114014	0.0217883	0.0044367	0.0156585
Metabolism; Biosynthesis of Other Secondary Metabolites; Indole alkaloid biosynthesis	Indole alkaloid biosynthesis	0.000117966	0.00011152	2.82775e-05	8.61119e-06	4.97968e-05	0.000120782	1.95341e-05	6.80101e-05	0.000397656	2.00188e-05	0.0002536	0.000177437	1.52031e-05	2.58779e-05	0.000217746	3.80089e-05
Human Diseases; Infectious Diseases; Influenza A	Influenza A	0.0087402	0.00287722	0.0067974	0.00634558	0.00808471	0.00881706	0.00675879	0.00707688	0.0061103	0.00632794	0.00714011	0.00699565	0.00260777	0.00390923	0.00552118	0.00339229
Unclassified; Cellular Processes and Signaling; Inorganic ion transport and metabolism	Inorganic ion transport and metabolism	0.412337	0.458889	0.430946	0.433775	0.432721	0.43439	0.429822	0.438929	0.441164	0.430509	0.431205	0.404128	0.332342	0.437816	0.319967	0.404332
Metabolism; Carbohydrate Metabolism; Inositol phosphate metabolism	Inositol phosphate metabolism	0.233017	0.186144	0.242587	0.231873	0.222412	0.229077	0.238397	0.24035	0.194486	0.236886	0.219096	0.204453	0.15772	0.209324	0.192726	0.211317
Organismal Systems; Endocrine System; Insulin signaling pathway	Insulin signaling pathway	0.0428516	0.0386889	0.0370826	0.0374561	0.0392876	0.0382672	0.0379176	0.040466	0.0568516	0.038328	0.0397338	0.0489545	0.0569748	0.0387717	0.0301031	0.0419737
Environmental Information Processing; Signaling Molecules and Interaction; Ion channels	Ion channels	0.0179812	0.00843884	0.0147725	0.0146494	0.0161694	0.0163104	0.0146193	0.0171395	0.0187456	0.0145857	0.02316	0.0195483	0.00964143	0.0110949	0.0586639	0.0225202
Metabolism; Biosynthesis of Other Secondary Metabolites; Isoflavonoid biosynthesis	Isoflavonoid biosynthesis	0.000109386	4.82055e-05	4.15845e-06	1.4639e-05	0.000148353	0.000102664	3.02778e-05	1.7242e-05	7.55641e-05	2.60244e-05	4.86613e-05	2.21796e-05	7.15438e-06	8.3477e-06	0.000215621	4.75111e-06
Metabolism; Biosynthesis of Other Secondary Metabolites; Isoquinoline alkaloid biosynthesis	Isoquinoline alkaloid biosynthesis	0.0477805	0.0407574	0.0433918	0.043353	0.0458784	0.0467401	0.0434672	0.0461453	0.0533501	0.0435139	0.0521471	0.0475521	0.0568532	0.0411542	0.0799562	0.0470621
Human Diseases; Infectious Diseases; Leishmaniasis	Leishmaniasis	0	0	0	0	0	0	0	5.74733e-06	1.32237e-05	2.00188e-06	1.12295e-05	0	0	0	0	0
Organismal Systems; Immune System; Leukocyte transendothelial migration	Leukocyte transendothelial migration	0	0	0	0	0	0	0	0	0	0	0	0	0	0	0	0
Metabolism; Metabolism of Terpenoids and Polyketides; Limonene and pinene degradation	Limonene and pinene degradation	0.26114	0.237875	0.24619	0.246775	0.260576	0.262087	0.245584	0.253872	0.284029	0.245339	0.26482	0.256465	0.343546	0.23081	0.273829	0.236371
Metabolism; Lipid Metabolism; Linoleic acid metabolism	Linoleic acid metabolism	0.0564316	0.0641248	0.0571388	0.0573651	0.0580153	0.0579849	0.0574761	0.0575413	0.0604796	0.0573098	0.0617596	0.0577699	0.0486185	0.0600083	0.0806976	0.0584493
Metabolism; Lipid Metabolism; Lipid biosynthesis proteins	Lipid biosynthesis proteins	0.729346	0.786919	0.749814	0.74484	0.741387	0.746055	0.749821	0.753245	0.796786	0.750848	0.733983	0.736602	0.856112	0.758563	0.599544	0.721155
Unclassified; Metabolism; Lipid metabolism	Lipid metabolism	0.120531	0.100488	0.116477	0.114438	0.117681	0.119609	0.116501	0.11696	0.111104	0.11597	0.119561	0.119977	0.110478	0.10731	0.168699	0.115104
Metabolism; Metabolism of Cofactors and Vitamins; Lipoic acid metabolism	Lipoic acid metabolism	0.0575223	0.067787	0.0591215	0.0599717	0.0598204	0.0588798	0.0593846	0.0616564	0.0768553	0.0599693	0.0672602	0.0666377	0.0404563	0.0626796	0.080106	0.0674348
Metabolism; Glycan Biosynthesis and Metabolism; Lipopolysaccharide biosynthesis	Lipopolysaccharide biosynthesis	0.370971	0.403217	0.394168	0.395311	0.392479	0.390282	0.391922	0.401257	0.405462	0.392474	0.37954	0.364283	0.371149	0.39228	0.194653	0.359753
Metabolism; Glycan Biosynthesis and Metabolism; Lipopolysaccharide biosynthesis proteins	Lipopolysaccharide biosynthesis proteins	0.516386	0.55909	0.540664	0.544943	0.552668	0.551086	0.540039	0.540493	0.524255	0.540622	0.514781	0.509941	0.480182	0.543557	0.288863	0.489844
Organismal Systems; Nervous System; Long-term depression	Long-term depression	0	0	0	0	0	0	0	0	0	0	0	0	0	0	0	0
Organismal Systems; Nervous System; Long-term potentiation	Long-term potentiation	0	0	0	0	0	0	0	0	0	0	0	0	0	0	0	0
Metabolism; Amino Acid Metabolism; Lysine biosynthesis	Lysine biosynthesis	0.591559	0.637124	0.600302	0.601275	0.595413	0.593816	0.601756	0.600185	0.616848	0.601526	0.565284	0.576318	0.597566	0.621634	0.329026	0.572398
Metabolism; Amino Acid Metabolism; Lysine degradation	Lysine degradation	0.383773	0.361421	0.372592	0.372591	0.386644	0.389415	0.371627	0.374098	0.384168	0.37104	0.374508	0.371	0.528057	0.355381	0.342447	0.345746
Cellular Processes; Transport and Catabolism; Lysosome	Lysosome	0.0544176	0.0785232	0.0591174	0.0600363	0.0563305	0.0556779	0.0584929	0.0772643	0.115053	0.0589043	0.0748476	0.0521816	0.0472637	0.0648349	0.0243387	0.0640532
Environmental Information Processing; Signal Transduction; MAPK signaling pathway	MAPK signaling pathway	0	0	0	0	0	0	0	0	0	0	0	0	0	0	0	0
Environmental Information Processing; Signal Transduction; MAPK signaling pathway - yeast	MAPK signaling pathway - yeast	0.0303923	0.0313062	0.0288904	0.0289241	0.0303532	0.0302908	0.0294799	0.0274186	0.027987	0.0292124	0.0336502	0.0347373	0.0240369	0.0308306	0.0669594	0.0369232
Human Diseases; Infectious Diseases; Measles	Measles	0	0	0	0	0	0	0	0	0	2.00188e-06	0	0	0	0	0	0
Cellular Processes; Cell Growth and Death; Meiosis - yeast	Meiosis - yeast	0.0384644	0.0517957	0.0403004	0.0396235	0.0378798	0.038411	0.0413195	0.0396049	0.0587246	0.0422727	0.0374177	0.0479493	0.0511306	0.0469583	0.0217448	0.0412004
Organismal Systems; Endocrine System; Melanogenesis	Melanogenesis	0.000924423	0.000144617	5.82183e-05	0.000139501	0.00105507	0.00123318	0.000224642	2.10735e-05	0.000112402	0.000200188	0.00036496	0.000992034	8.31697e-05	0.000116033	0.00219764	8.31444e-05
Unclassified; Cellular Processes and Signaling; Membrane and intracellular structural molecules	Membrane and intracellular structural molecules	1.03608	1.15904	1.12734	1.12594	1.10143	1.1045	1.1233	1.08082	0.946413	1.12466	0.994346	1.02277	0.880477	1.14362	0.562062	1.00785
Unclassified; Metabolism; Metabolism of cofactors and vitamins	Metabolism of cofactors and vitamins	0.209336	0.209176	0.21055	0.212081	0.21553	0.215117	0.210322	0.21131	0.205949	0.210478	0.201028	0.205948	0.178227	0.208445	0.118467	0.194072
Metabolism; Xenobiotics Biodegradation and Metabolism; Metabolism of xenobiotics by cytochrome P450	Metabolism of xenobiotics by cytochrome P450	0.201353	0.24421	0.219733	0.217206	0.21825	0.221305	0.221104	0.204347	0.192865	0.221513	0.190134	0.222037	0.154334	0.229493	0.105579	0.194431
Metabolism; Energy Metabolism; Methane metabolism	Methane metabolism	0.832363	0.745827	0.790941	0.788216	0.79352	0.792718	0.79014	0.829603	0.906895	0.788724	0.829005	0.80554	1.06848	0.762795	0.834997	0.822655
Organismal Systems; Digestive System; Mineral absorption	Mineral absorption	0.0178783	0.0246575	0.0201319	0.019748	0.0202196	0.0201838	0.0205909	0.0185696	0.0230026	0.0211028	0.0172354	0.0252717	0.011676	0.022472	0.00964029	0.0180993
Genetic Information Processing; Replication and Repair; Mismatch repair	Mismatch repair	0.567269	0.587893	0.562797	0.564557	0.562561	0.55948	0.565467	0.560485	0.583567	0.565194	0.600736	0.589555	0.585242	0.582964	0.807101	0.611005
Genetic Information Processing; Translation; mRNA surveillance pathway	mRNA surveillance pathway	6.4345e-05	1.00728e-05	6.65352e-06	0	0	0	0	0	4.72275e-05	6.00564e-06	3.74317e-06	3.02449e-05	0	0	0	0
Environmental Information Processing; Signal Transduction; mTOR signaling pathway	mTOR signaling pathway	0	0	0	0	0	0	0	0	0	2.00188e-06	0	0	0	0	0	0
Metabolism; Xenobiotics Biodegradation and Metabolism; Naphthalene degradation	Naphthalene degradation	0.22107	0.197795	0.219224	0.214628	0.214769	0.217431	0.217804	0.219951	0.212826	0.216971	0.201087	0.206715	0.25277	0.203296	0.127795	0.197666
Environmental Information Processing; Signaling Molecules and Interaction; Neuroactive ligand-receptor interaction	Neuroactive ligand-receptor interaction	0	0	0	0	1.65989e-05	0	0	0	0	0	0	0	0	0	0	0
Organismal Systems; Nervous System; Neurotrophin signaling pathway	Neurotrophin signaling pathway	0	0	0	0	0	0	0	0	0	0	0	0	0	0	0	0
Metabolism; Glycan Biosynthesis and Metabolism; N-Glycan biosynthesis	N-Glycan biosynthesis	0.025619	0.0313652	0.0264561	0.0255744	0.0241296	0.024689	0.0265957	0.0316774	0.0519267	0.0270364	0.0289806	0.0289222	0.0278171	0.0274681	0.0120164	0.024859
Metabolism; Metabolism of Cofactors and Vitamins; Nicotinate and nicotinamide metabolism	Nicotinate and nicotinamide metabolism	0.44533	0.443609	0.452199	0.452705	0.443122	0.442139	0.450007	0.455302	0.447742	0.450426	0.463193	0.444519	0.400911	0.446969	0.525571	0.455473
Metabolism; Energy Metabolism; Nitrogen metabolism	Nitrogen metabolism	0.765803	0.652005	0.763418	0.753775	0.753555	0.759912	0.755439	0.775114	0.74113	0.755329	0.729991	0.712005	0.675342	0.693987	0.550109	0.746228
Metabolism; Xenobiotics Biodegradation and Metabolism; Nitrotoluene degradation	Nitrotoluene degradation	0.0640072	0.0514561	0.0596721	0.0601233	0.05856	0.0576817	0.0586892	0.0640186	0.0668317	0.0583838	0.0595586	0.0555892	0.112269	0.0555581	0.0400216	0.062755
Organismal Systems; Immune System; NOD-like receptor signaling pathway	NOD-like receptor signaling pathway	0.0296362	0.0326553	0.0303035	0.0311122	0.0303335	0.0296386	0.0304214	0.0288995	0.0271256	0.0304836	0.0278146	0.0288638	0.0220382	0.0325001	0.0174345	0.0315236
Genetic Information Processing; Replication and Repair; Non-homologous end-joining	Non-homologous end-joining	0.029411	0.0332935	0.0290767	0.0290309	0.0316012	0.0329251	0.0293265	0.028616	0.029861	0.0293666	0.0304077	0.0299062	0.0160205	0.0295959	0.0193932	0.0251013
Environmental Information Processing; Signal Transduction; Notch signaling pathway	Notch signaling pathway	1.82311e-05	2.87794e-06	1.66338e-06	0	0	1.20782e-06	0	5.74733e-06	5.00612e-05	4.00376e-06	1.87159e-05	0	0	8.3477e-07	0	1.18778e-06
Metabolism; Biosynthesis of Other Secondary Metabolites; Novobiocin biosynthesis	Novobiocin biosynthesis	0.130143	0.131579	0.134517	0.133631	0.131264	0.131711	0.133536	0.135073	0.131186	0.133704	0.132717	0.127715	0.128823	0.131746	0.115335	0.128825
Genetic Information Processing; Replication and Repair; Nucleotide excision repair	Nucleotide excision repair	0.236316	0.256966	0.228888	0.229072	0.232395	0.232512	0.231667	0.232794	0.267556	0.231346	0.268182	0.254745	0.267308	0.243812	0.433182	0.265265
Unclassified; Metabolism; Nucleotide metabolism	Nucleotide metabolism	0.0229283	0.0111168	0.0166238	0.0173679	0.0173127	0.0161086	0.0167515	0.0185016	0.017119	0.0161472	0.0254199	0.01914	0.047675	0.0155751	0.0666833	0.0281182
Organismal Systems; Sensory System; Olfactory transduction	Olfactory transduction	0	0	0	0	0	0	0	0	0	0	0	0	0	0	0	0
Metabolism; Metabolism of Cofactors and Vitamins; One carbon pool by folate	One carbon pool by folate	0.469175	0.506841	0.478233	0.479028	0.475886	0.475534	0.479458	0.474781	0.488109	0.479268	0.490448	0.483153	0.510333	0.492542	0.548914	0.484893
Cellular Processes; Cell Growth and Death; Oocyte meiosis	Oocyte meiosis	0	0	0	0	0	0	0	0	0	0	0	0	0	0	0	0
Metabolism; Glycan Biosynthesis and Metabolism; Other glycan degradation	Other glycan degradation	0.100563	0.10049	0.106179	0.104932	0.0989451	0.0994818	0.104669	0.107264	0.0982578	0.104576	0.100371	0.0943551	0.0697758	0.103703	0.0893681	0.108013
Unclassified; Cellular Processes and Signaling; Other ion-coupled transporters	Other ion-coupled transporters	1.44785	1.2485	1.4555	1.44889	1.43283	1.43618	1.44118	1.45236	1.23232	1.4374	1.32792	1.30783	1.15457	1.3502	0.902899	1.34288
Unclassified; Cellular Processes and Signaling; Other transporters	Other transporters	0.332633	0.358439	0.350811	0.349491	0.345876	0.347451	0.350785	0.338342	0.301193	0.350851	0.30953	0.327077	0.297538	0.356028	0.172544	0.327809
Metabolism; Glycan Biosynthesis and Metabolism; Other types of O-glycan biosynthesis	Other types of O-glycan biosynthesis	0	0	0	0	0	0	0	0	0	0	0	0	0	0	0	0
Unclassified; Metabolism; Others	Others	0.833722	0.800899	0.810611	0.801329	0.821407	0.832864	0.811784	0.860044	1.03884	0.8159	0.857979	0.864703	0.751418	0.785226	0.826563	0.862983
Metabolism; Energy Metabolism; Oxidative phosphorylation	Oxidative phosphorylation	1.26579	1.46205	1.34811	1.3364	1.32486	1.33556	1.34968	1.32832	1.40842	1.35598	1.30695	1.35593	1.06967	1.38423	1.12787	1.28835
Cellular Processes; Cell Growth and Death; p53 signaling pathway	p53 signaling pathway	0.00880132	0.00295061	0.00682069	0.00634989	0.00809716	0.00882189	0.00675977	0.00712765	0.00689239	0.00634296	0.00723649	0.00705917	0.00261761	0.00394846	0.00563377	0.00340179
Human Diseases; Cancers; Pancreatic cancer	Pancreatic cancer	0	0	0	0	0	0	0	0	0	0	0	0	0	0	0	0
Organismal Systems; Digestive System; Pancreatic secretion	Pancreatic secretion	0	3.59743e-06	8.3169e-07	0	1.65989e-05	0	0	3.83155e-06	9.44551e-07	0	9.35794e-07	0	0	0	0	7.12666e-05
Metabolism; Metabolism of Cofactors and Vitamins; Pantothenate and CoA biosynthesis	Pantothenate and CoA biosynthesis	0.471278	0.515656	0.473249	0.474146	0.473893	0.471615	0.475519	0.478527	0.532022	0.476103	0.500618	0.497363	0.501531	0.493956	0.56066	0.492166
Human Diseases; Neurodegenerative Diseases; Parkinson's disease	Parkinson's disease	0.0840303	0.0911962	0.0918519	0.0913742	0.0902265	0.0916829	0.091023	0.0871688	0.0704163	0.0907372	0.0799102	0.0805019	0.0495504	0.0900266	0.0389287	0.0755794
Human Diseases; Infectious Diseases; Pathogenic Escherichia coli infection	Pathogenic Escherichia coli infection	0	0	0	0	0	0	0	0	0	0	0	0	0	0	0	0
Human Diseases; Cancers; Pathways in cancer	Pathways in cancer	0.0632608	0.0636658	0.0636135	0.0631846	0.064879	0.0656327	0.0637847	0.0623068	0.0592555	0.0634406	0.059159	0.0621513	0.0480319	0.0629292	0.0354787	0.0555203
Metabolism; Biosynthesis of Other Secondary Metabolites; Penicillin and cephalosporin biosynthesis	Penicillin and cephalosporin biosynthesis	0.0648962	0.0788002	0.0726182	0.0705514	0.067624	0.0691052	0.0724734	0.0695686	0.0676893	0.0730386	0.0608977	0.0652061	0.0629845	0.0752437	0.0299852	0.0642991
Metabolism; Carbohydrate Metabolism; Pentose and glucuronate interconversions	Pentose and glucuronate interconversions	0.408574	0.383411	0.397776	0.390644	0.385167	0.390841	0.398697	0.403123	0.396104	0.396507	0.408154	0.384195	0.336936	0.391425	0.511487	0.435343
Metabolism; Carbohydrate Metabolism; Pentose phosphate pathway	Pentose phosphate pathway	0.66835	0.678719	0.658733	0.656364	0.656157	0.657925	0.661768	0.6643	0.688931	0.661849	0.69799	0.689907	0.684204	0.673876	0.905672	0.707575
Metabolism; Enzyme Families; Peptidases	Peptidases	1.55152	1.70132	1.61346	1.61209	1.58934	1.58635	1.61527	1.58679	1.6127	1.62007	1.59306	1.63392	1.46003	1.66006	1.59288	1.60872
Metabolism; Glycan Biosynthesis and Metabolism; Peptidoglycan biosynthesis	Peptidoglycan biosynthesis	0.616689	0.646768	0.624234	0.622872	0.6172	0.615654	0.626685	0.604545	0.591735	0.625869	0.56532	0.605084	0.628639	0.643589	0.341249	0.606288
Cellular Processes; Transport and Catabolism; Peroxisome	Peroxisome	0.261056	0.261788	0.263075	0.262725	0.263336	0.262937	0.262855	0.25889	0.242955	0.262542	0.261785	0.261373	0.326034	0.261928	0.29604	0.264411
Human Diseases; Infectious Diseases; Pertussis	Pertussis	0.0617144	0.0630442	0.059381	0.0609526	0.0684934	0.0682573	0.0604912	0.0556054	0.0439613	0.0604848	0.0543443	0.0643552	0.0522994	0.0624341	0.0450213	0.0505743
Cellular Processes; Transport and Catabolism; Phagosome	Phagosome	0	0	0	0	0	0	0	0	0	2.00188e-06	0	0	0	0	0	0
Metabolism; Amino Acid Metabolism; Phenylalanine metabolism	Phenylalanine metabolism	0.388435	0.331787	0.406004	0.395046	0.384221	0.393086	0.398584	0.405969	0.356445	0.397715	0.371962	0.350182	0.331693	0.355098	0.280229	0.317115
Metabolism; Amino Acid Metabolism; Phenylalanine, tyrosine and tryptophan biosynthesis	Phenylalanine, tyrosine and tryptophan biosynthesis	0.692866	0.750141	0.71376	0.711485	0.704045	0.704264	0.714437	0.71231	0.735784	0.715097	0.674433	0.689624	0.717073	0.730751	0.420316	0.673205
Metabolism; Biosynthesis of Other Secondary Metabolites; Phenylpropanoid biosynthesis	Phenylpropanoid biosynthesis	0.111384	0.0943015	0.114022	0.110398	0.105129	0.107434	0.112631	0.112076	0.0949198	0.112039	0.109206	0.10395	0.0945506	0.102725	0.147588	0.104649
Environmental Information Processing; Signal Transduction; Phosphatidylinositol signaling system	Phosphatidylinositol signaling system	0.0937163	0.0995652	0.0939194	0.0942899	0.0947581	0.094171	0.094293	0.0955657	0.104287	0.0945057	0.105306	0.102164	0.0845317	0.0965729	0.148034	0.0998528
Metabolism; Metabolism of Other Amino Acids; Phosphonate and phosphinate metabolism	Phosphonate and phosphinate metabolism	0.0790017	0.071542	0.0797499	0.0798507	0.0792349	0.079269	0.078947	0.078702	0.0673059	0.078766	0.0727158	0.0706784	0.0654358	0.0760309	0.0426696	0.0702629
Environmental Information Processing; Membrane Transport; Phosphotransferase system (PTS)	Phosphotransferase system (PTS)	0.243514	0.17964	0.222105	0.237691	0.233745	0.218521	0.218125	0.230174	0.171976	0.216806	0.330772	0.256583	0.237365	0.212946	0.869219	0.387708
Metabolism; Energy Metabolism; Photosynthesis	Photosynthesis	0.277117	0.268169	0.273545	0.268171	0.271554	0.268836	0.275135	0.290856	0.440772	0.284488	0.32275	0.419788	0.286677	0.267088	0.528713	0.337561
Metabolism; Energy Metabolism; Photosynthesis - antenna proteins	Photosynthesis - antenna proteins	0.0060924	0.00196779	0.000650382	0.000204946	0.00296706	0.00184554	0.0018909	0.00476262	0.0456936	0.00427902	0.00499339	0.0394243	0.000549993	0.00200595	0.00725146	0.0102232
Metabolism; Energy Metabolism; Photosynthesis proteins	Photosynthesis proteins	0.300038	0.277562	0.28889	0.282957	0.289888	0.285873	0.291547	0.311532	0.501456	0.302948	0.342417	0.474204	0.302723	0.279623	0.545823	0.360218
Organismal Systems; Sensory System; Phototransduction	Phototransduction	0	0	0	0	0	0	0	0	0	0	0	0	0	0	0	0
Organismal Systems; Sensory System; Phototransduction - fly	Phototransduction - fly	0	0	0	0	0	0	0	0	0	0	0	0	0	0	0	0
Organismal Systems; Environmental Adaptation; Plant-pathogen interaction	Plant-pathogen interaction	0.187552	0.190599	0.192523	0.192525	0.185582	0.18506	0.191938	0.187372	0.165368	0.191516	0.184295	0.176437	0.175798	0.195551	0.194604	0.189324
Metabolism; Xenobiotics Biodegradation and Metabolism; Polycyclic aromatic hydrocarbon degradation	Polycyclic aromatic hydrocarbon degradation	0.0358144	0.0195952	0.0204687	0.0193743	0.0269141	0.0276264	0.0214318	0.0304503	0.0687699	0.0217744	0.0355274	0.0395241	0.0499412	0.0158757	0.0352737	0.0244421
Metabolism; Metabolism of Terpenoids and Polyketides; Polyketide sugar unit biosynthesis	Polyketide sugar unit biosynthesis	0.133779	0.139691	0.132271	0.128248	0.129153	0.132691	0.133978	0.130882	0.145688	0.133387	0.119452	0.13403	0.149536	0.135519	0.0761738	0.115239
Unclassified; Cellular Processes and Signaling; Pores ion channels	Pores ion channels	0.797122	0.865599	0.862008	0.861476	0.854842	0.85785	0.859011	0.820839	0.685341	0.859622	0.746624	0.796518	0.689679	0.862174	0.404773	0.728183
Metabolism; Metabolism of Cofactors and Vitamins; Porphyrin and chlorophyll metabolism	Porphyrin and chlorophyll metabolism	0.695715	0.703086	0.677704	0.68131	0.710331	0.707346	0.681843	0.693289	0.829942	0.688207	0.684096	0.797418	0.738869	0.67899	0.511723	0.680464
Organismal Systems; Endocrine System; PPAR signaling pathway	PPAR signaling pathway	0.133769	0.132159	0.125469	0.124146	0.127551	0.128257	0.126792	0.127264	0.147793	0.126218	0.135475	0.13868	0.257977	0.127842	0.189228	0.136035
Metabolism; Metabolism of Terpenoids and Polyketides; Prenyltransferases	Prenyltransferases	0.225852	0.236332	0.221213	0.220429	0.221924	0.221156	0.222466	0.23081	0.288119	0.223818	0.235844	0.247129	0.253304	0.226838	0.226516	0.230518
Metabolism; Lipid Metabolism; Primary bile acid biosynthesis	Primary bile acid biosynthesis	0.00476367	0.00743372	0.00241107	0.00341864	0.00498175	0.00449912	0.00266933	0.00536609	0.0157315	0.00272856	0.00839781	0.00580703	0.0109346	0.00414714	0.0075956	0.00596383
Human Diseases; Immune System Diseases; Primary immunodeficiency	Primary immunodeficiency	0.0438082	0.0373362	0.0428811	0.04269	0.0419475	0.0418822	0.0425101	0.0423981	0.0375043	0.0425059	0.0453401	0.0430093	0.0390933	0.0404872	0.0716574	0.0479696
Human Diseases; Neurodegenerative Diseases; Prion diseases	Prion diseases	0.0238055	0.0282974	0.0282034	0.0281482	0.0265801	0.0263799	0.027883	0.0260306	0.0185604	0.0277741	0.0232844	0.0226575	0.0150797	0.0280216	0.00972845	0.0209405
Organismal Systems; Endocrine System; Progesterone-mediated oocyte maturation	Progesterone-mediated oocyte maturation	0.027486	0.0296975	0.0282725	0.0282378	0.0275158	0.0274488	0.0284367	0.0268956	0.0258193	0.0284637	0.0248996	0.0266891	0.0207245	0.0297579	0.0152656	0.0272642
Metabolism; Carbohydrate Metabolism; Propanoate metabolism	Propanoate metabolism	0.844719	0.761637	0.843995	0.833266	0.83476	0.84302	0.836974	0.845453	0.80541	0.833923	0.813134	0.789692	1.03254	0.783087	0.715994	0.757743
Human Diseases; Cancers; Prostate cancer	Prostate cancer	0.027486	0.0296975	0.0282725	0.0282378	0.0275158	0.0274488	0.0284367	0.0268956	0.0258193	0.0284637	0.0248996	0.0266891	0.0207245	0.0297579	0.0152656	0.0272642
Genetic Information Processing; Folding, Sorting and Degradation; Proteasome	Proteasome	0.0278968	0.0307731	0.0283074	0.0282697	0.027686	0.0275696	0.0284446	0.0270699	0.0279266	0.0286279	0.025739	0.0273868	0.0207316	0.029848	0.0154748	0.0273545
Organismal Systems; Digestive System; Protein digestion and absorption	Protein digestion and absorption	0.0154911	0.0243618	0.0200213	0.0196361	0.0182173	0.0185327	0.0199511	0.017675	0.0155653	0.0200538	0.0156989	0.0168605	0.0114184	0.0219361	0.00538416	0.0158354
Genetic Information Processing; Folding, Sorting and Degradation; Protein export	Protein export	0.468555	0.512827	0.47455	0.476202	0.472568	0.469304	0.476455	0.473661	0.501913	0.476609	0.498827	0.49031	0.505005	0.495498	0.598816	0.499516
Unclassified; Genetic Information Processing; Protein folding and associated processing	Protein folding and associated processing	0.769826	0.690424	0.742824	0.738846	0.746233	0.749973	0.742996	0.752548	0.771958	0.742621	0.732769	0.756212	0.82372	0.716073	0.68973	0.729383
Metabolism; Enzyme Families; Protein kinases	Protein kinases	0.513786	0.513648	0.520888	0.527125	0.526035	0.52244	0.519653	0.517677	0.521312	0.524371	0.486844	0.524769	0.442056	0.520708	0.338295	0.502558
Genetic Information Processing; Folding, Sorting and Degradation; Protein processing in endoplasmic reticulum	Protein processing in endoplasmic reticulum	0.0556852	0.0589632	0.0548209	0.053832	0.0521279	0.0523866	0.0553196	0.0546724	0.0608329	0.0551798	0.050297	0.0557999	0.080392	0.0578512	0.0334978	0.0526577
Organismal Systems; Excretory System; Proximal tubule bicarbonate reclamation	Proximal tubule bicarbonate reclamation	0.0132958	0.00732436	0.00854063	0.0089143	0.0102509	0.00966615	0.00882062	0.010987	0.0176905	0.00877024	0.0117498	0.011734	0.00939013	0.00823584	0.0126101	0.0115998
Metabolism; Nucleotide Metabolism; Purine metabolism	Purine metabolism	1.91805	1.96722	1.93237	1.9334	1.92035	1.91606	1.93402	1.92953	1.94994	1.93407	2.02549	1.97765	1.81755	1.95501	2.54273	2.04161
Metabolism; Nucleotide Metabolism; Pyrimidine metabolism	Pyrimidine metabolism	1.29077	1.33846	1.283	1.28465	1.26924	1.26223	1.28759	1.28673	1.33303	1.28607	1.42591	1.34589	1.31816	1.32622	2.21363	1.45164
Metabolism; Carbohydrate Metabolism; Pyruvate metabolism	Pyruvate metabolism	1.09655	1.02476	1.09174	1.08547	1.07007	1.06949	1.0872	1.09727	1.07116	1.0847	1.09459	1.05894	1.10559	1.05628	1.17914	1.07935
Cellular Processes; Cell Motility; Regulation of actin cytoskeleton	Regulation of actin cytoskeleton	0	0	0	0	0	0	0	0	0	0	0	0	0	0	0	0
Human Diseases; Cancers; Renal cell carcinoma	Renal cell carcinoma	0.0270163	0.0310882	0.0285419	0.0286012	0.029295	0.0293656	0.0285891	0.0283229	0.0272626	0.0286449	0.0270763	0.0284665	0.0246996	0.0292612	0.014692	0.0248625
Organismal Systems; Endocrine System; Renin-angiotensin system	Renin-angiotensin system	0.0152508	0.0237279	0.0198691	0.0195181	0.0177546	0.0180146	0.0197568	0.0174125	0.0130178	0.0200008	0.0150101	0.0164664	0.0114041	0.021795	0.0046332	0.0156703
Unclassified; Genetic Information Processing; Replication, recombination and repair proteins	Replication, recombination and repair proteins	0.665755	0.739462	0.665381	0.675356	0.679302	0.673472	0.667987	0.668427	0.801469	0.674394	0.7163	0.740487	0.737023	0.705303	0.732303	0.714909
Unclassified; Genetic Information Processing; Restriction enzyme	Restriction enzyme	0.112543	0.148825	0.123541	0.130764	0.126528	0.119006	0.12262	0.128656	0.153795	0.124784	0.150808	0.135701	0.158967	0.136207	0.204877	0.136892
Metabolism; Metabolism of Cofactors and Vitamins; Retinol metabolism	Retinol metabolism	0.0832614	0.0872973	0.0876784	0.0854479	0.0836378	0.0849808	0.0874297	0.0859475	0.0864632	0.0875462	0.0776288	0.0860055	0.0782815	0.0855072	0.0414885	0.0807759
Human Diseases; Immune System Diseases; Rheumatoid arthritis	Rheumatoid arthritis	0	0	0	0	0	0	0	0	0	0	0	0	0	0	0	0
Metabolism; Metabolism of Cofactors and Vitamins; Riboflavin metabolism	Riboflavin metabolism	0.271934	0.290009	0.275223	0.277309	0.280458	0.279652	0.276559	0.270466	0.267223	0.276709	0.298777	0.296053	0.263328	0.283497	0.444131	0.301539
Genetic Information Processing; Translation; Ribosome	Ribosome	1.55582	1.69535	1.55535	1.55584	1.54527	1.53801	1.56724	1.5512	1.66753	1.56455	1.82024	1.7108	1.71959	1.64096	3.28854	1.81259
Genetic Information Processing; Translation; Ribosome Biogenesis	Ribosome Biogenesis	1.41636	1.53288	1.48448	1.48718	1.45693	1.4518	1.48238	1.45207	1.37007	1.4832	1.48059	1.44382	1.31974	1.51818	1.64412	1.50548
Genetic Information Processing; Translation; Ribosome biogenesis in eukaryotes	Ribosome biogenesis in eukaryotes	0.0693693	0.0843452	0.0765596	0.076333	0.0742771	0.0745851	0.0766928	0.0721271	0.0672171	0.0770644	0.0732848	0.073723	0.0593045	0.0807031	0.0816482	0.0768159
Organismal Systems; Immune System; RIG-I-like receptor signaling pathway	RIG-I-like receptor signaling pathway	0.000396794	0.00026621	6.48718e-05	3.78892e-05	0.000123454	0.000262096	5.66489e-05	0.000102494	0.000456218	0.000139131	0.000570834	0.000683536	3.66662e-05	5.67644e-05	0.000468419	6.65155e-05
Genetic Information Processing; Folding, Sorting and Degradation; RNA degradation	RNA degradation	0.443005	0.478526	0.461649	0.460736	0.452386	0.451681	0.460825	0.462278	0.481797	0.462089	0.458735	0.460026	0.408053	0.46796	0.421154	0.452096
Genetic Information Processing; Transcription; RNA polymerase	RNA polymerase	0.112229	0.126675	0.113997	0.114118	0.113652	0.113081	0.114775	0.116298	0.133081	0.114929	0.139051	0.129031	0.123459	0.119711	0.254453	0.133978
Genetic Information Processing; Translation; RNA transport	RNA transport	0.094541	0.0992537	0.0994485	0.09933	0.0973112	0.0966289	0.0988317	0.101494	0.106318	0.099043	0.0940388	0.0934548	0.111941	0.0983894	0.04927	0.0913056
Organismal Systems; Digestive System; Salivary secretion	Salivary secretion	0	0	0	0	0	0	0	3.83155e-06	0	0	0	0	0	0	0	7.12666e-06
Metabolism; Lipid Metabolism; Secondary bile acid biosynthesis	Secondary bile acid biosynthesis	0.00296845	0.00576883	0.00220232	0.00307764	0.00334157	0.00269947	0.00220931	0.00495228	0.0112921	0.00234821	0.00661045	0.00368283	0.00185925	0.00375229	0.00325662	0.00551366
Environmental Information Processing; Membrane Transport; Secretion system	Secretion system	2.31099	2.55541	2.41338	2.45704	2.4427	2.42524	2.40847	2.37305	2.21247	2.41645	2.28871	2.3307	2.02112	2.49723	1.57905	2.35687
Metabolism; Metabolism of Other Amino Acids; Selenocompound metabolism	Selenocompound metabolism	0.332179	0.383447	0.347064	0.34409	0.337831	0.339829	0.348639	0.344181	0.360624	0.348429	0.35618	0.349241	0.365386	0.364952	0.417247	0.366913
Metabolism; Metabolism of Terpenoids and Polyketides; Sesquiterpenoid biosynthesis	Sesquiterpenoid biosynthesis	0	0	0	0	0	0	0	0	0	4.00376e-06	0	0	0	0	0	0
Human Diseases; Infectious Diseases; Shigellosis	Shigellosis	0	0	0	0	0	0	1.95341e-06	0	0	0	9.35794e-07	2.01633e-06	0	0	8.49739e-06	0
Unclassified; Cellular Processes and Signaling; Signal transduction mechanisms	Signal transduction mechanisms	0.503025	0.526198	0.514924	0.519029	0.514585	0.511671	0.513437	0.537114	0.580475	0.515361	0.527793	0.510251	0.464072	0.515491	0.417218	0.510752
Human Diseases; Cancers; Small cell lung cancer	Small cell lung cancer	0.0087402	0.00287722	0.0067974	0.00634558	0.00806811	0.00881706	0.00675879	0.00708263	0.00612352	0.00632794	0.00716444	0.00699565	0.00260777	0.00390923	0.00552118	0.00339229
Metabolism; Lipid Metabolism; Sphingolipid metabolism	Sphingolipid metabolism	0.0861966	0.063627	0.0823024	0.0798507	0.0734876	0.0751334	0.0799628	0.103589	0.127672	0.0789231	0.0920175	0.0616372	0.0713623	0.068331	0.0381225	0.0670583
Genetic Information Processing; Transcription; Spliceosome	Spliceosome	0	0	0	0	0	0	0	0	0	0	0	0	0	0	0	0
Unclassified; Cellular Processes and Signaling; Sporulation	Sporulation	0.0227449	0.0129817	0.0165872	0.0171853	0.0182837	0.0155349	0.0167602	0.0227058	0.0351694	0.0168728	0.0233948	0.0194354	0.0358068	0.0154458	0.0162417	0.0210011
Human Diseases; Infectious Diseases; Staphylococcus aureus infection	Staphylococcus aureus infection	0.00258238	0.00101088	0.000324359	0.000413337	0.00230103	0.002348	0.00069346	0.000454039	0.00420703	0.000776729	0.00152066	0.00462848	0.00073243	0.000924925	0.00371017	0.00183987
Metabolism; Carbohydrate Metabolism; Starch and sucrose metabolism	Starch and sucrose metabolism	0.591772	0.58284	0.591909	0.587929	0.571779	0.57191	0.59138	0.594206	0.600933	0.592475	0.583197	0.590203	0.535317	0.593085	0.596063	0.595275
Metabolism; Lipid Metabolism; Steroid biosynthesis	Steroid biosynthesis	0.00231213	0.00622211	0.000281111	0.000510643	0.00196282	0.00184675	0.000652438	0.0075041	0.0248152	0.000719676	0.00931863	0.00609032	0.0179924	0.00140575	0.00492636	0.00172346
Metabolism; Lipid Metabolism; Steroid hormone biosynthesis	Steroid hormone biosynthesis	0.014868	0.0137515	0.0128554	0.0120996	0.0118765	0.0129333	0.0124266	0.0239051	0.0531744	0.0126078	0.0241117	0.0132967	0.0146271	0.00959986	0.00721747	0.0102766
Metabolism; Biosynthesis of Other Secondary Metabolites; Stilbenoid, diarylheptanoid and gingerol biosynthesis	Stilbenoid, diarylheptanoid and gingerol biosynthesis	0.00225529	0.00409531	0.000330181	0.000331531	0.00115466	0.00120661	0.000529374	0.00249817	0.0205742	0.00107501	0.00477348	0.00705715	0.000205689	0.000891535	0.00307287	0.00258104
Metabolism; Biosynthesis of Other Secondary Metabolites; Streptomycin biosynthesis	Streptomycin biosynthesis	0.241742	0.238229	0.234736	0.228406	0.229678	0.235007	0.236885	0.237212	0.261392	0.235838	0.218069	0.235171	0.249621	0.234969	0.136263	0.208972
Metabolism; Xenobiotics Biodegradation and Metabolism; Styrene degradation	Styrene degradation	0.103204	0.0921035	0.108024	0.105476	0.105529	0.10827	0.106767	0.103662	0.0848292	0.106565	0.0920231	0.0945164	0.0815752	0.0970854	0.0525564	0.0805895
Metabolism; Energy Metabolism; Sulfur metabolism	Sulfur metabolism	0.351776	0.403451	0.373721	0.376118	0.372761	0.372238	0.373752	0.366891	0.369793	0.375092	0.344923	0.361157	0.298339	0.386915	0.186517	0.339355
Genetic Information Processing; Folding, Sorting and Degradation; Sulfur relay system	Sulfur relay system	0.314433	0.280255	0.295961	0.299205	0.310338	0.307857	0.296589	0.308069	0.332425	0.296492	0.311743	0.311616	0.291204	0.287259	0.288507	0.309564
Metabolism; Lipid Metabolism; Synthesis and degradation of ketone bodies	Synthesis and degradation of ketone bodies	0.149024	0.164866	0.160577	0.156805	0.156252	0.159806	0.160167	0.149972	0.131622	0.160182	0.135087	0.14499	0.21567	0.158855	0.0811416	0.130006
Human Diseases; Immune System Diseases; Systemic lupus erythematosus	Systemic lupus erythematosus	0.000983406	0.00115477	7.31887e-05	0.000178252	0.00106026	0.00123922	0.000234409	0.00139469	0.00465758	0.00022321	0.00198201	0.00101421	8.13811e-05	0.000298848	0.00177914	0.000296944
Metabolism; Metabolism of Other Amino Acids; Taurine and hypotaurine metabolism	Taurine and hypotaurine metabolism	0.12637	0.115508	0.124827	0.125832	0.125322	0.124639	0.123695	0.127872	0.127406	0.12398	0.133661	0.123938	0.116418	0.119294	0.167525	0.129009
Metabolism; Metabolism of Terpenoids and Polyketides; Terpenoid backbone biosynthesis	Terpenoid backbone biosynthesis	0.40003	0.418384	0.395903	0.394233	0.393528	0.39295	0.397943	0.398221	0.444178	0.398295	0.432742	0.425624	0.500514	0.406715	0.616171	0.427046
Metabolism; Metabolism of Terpenoids and Polyketides; Tetracycline biosynthesis	Tetracycline biosynthesis	0.139351	0.154943	0.142428	0.142403	0.14172	0.140934	0.143383	0.141828	0.150863	0.143048	0.134037	0.139835	0.135021	0.150277	0.077595	0.137043
Environmental Information Processing; Signal Transduction; TGF-beta signaling pathway	TGF-beta signaling pathway	0	0	0	0	0	0	0	0	0	0	0	0	0	0	0	0
Metabolism; Metabolism of Cofactors and Vitamins; Thiamine metabolism	Thiamine metabolism	0.297405	0.282371	0.286688	0.286188	0.286177	0.284632	0.287478	0.294639	0.321985	0.286992	0.306088	0.301681	0.29779	0.284953	0.362046	0.303893
Cellular Processes; Cell Communication; Tight junction	Tight junction	0	0	0	0	0	0	0	0	0	0	0	0	0	0	0	0
Metabolism; Xenobiotics Biodegradation and Metabolism; Toluene degradation	Toluene degradation	0.191447	0.196655	0.199934	0.199969	0.199634	0.199814	0.198823	0.196518	0.185126	0.199169	0.182651	0.189143	0.148063	0.195463	0.101468	0.1756
Human Diseases; Infectious Diseases; Toxoplasmosis	Toxoplasmosis	0.0087402	0.00287722	0.0067974	0.00634558	0.00806811	0.00881706	0.00675879	0.00707688	0.0061103	0.00632594	0.00714011	0.00699565	0.00260777	0.00390923	0.00552118	0.00343861
Genetic Information Processing; Transcription; Transcription factors	Transcription factors	1.72001	1.4875	1.70622	1.7032	1.68537	1.68613	1.69009	1.70547	1.44181	1.68415	1.57973	1.53006	1.38948	1.60112	1.07539	1.56857
Genetic Information Processing; Transcription; Transcription machinery	Transcription machinery	0.679832	0.811029	0.701564	0.70279	0.705937	0.707669	0.706216	0.72504	0.840157	0.708437	0.759965	0.724207	0.649751	0.747265	0.819699	0.715885
Unclassified; Genetic Information Processing; Transcription related proteins	Transcription related proteins	0.0114438	0.00625089	0.00841338	0.00903658	0.0111534	0.0113233	0.00857742	0.00998503	0.0109275	0.00849898	0.0106035	0.00967536	0.00433645	0.00712894	0.00991327	0.00870522
Genetic Information Processing; Translation; Translation factors	Translation factors	0.412918	0.442297	0.420676	0.420785	0.4138	0.412105	0.421662	0.418031	0.42984	0.421401	0.454223	0.433629	0.455415	0.434601	0.659673	0.456391
Unclassified; Genetic Information Processing; Translation proteins	Translation proteins	0.820997	0.865513	0.843678	0.844664	0.833202	0.830351	0.843727	0.837015	0.841549	0.843873	0.851691	0.839951	0.771523	0.858362	0.921708	0.857441
Environmental Information Processing; Membrane Transport; Transporters	Transporters	4.80503	3.79597	4.19467	4.19773	4.38734	4.38473	4.2297	4.29453	4.21969	4.20515	4.56498	4.56341	4.91682	4.08948	6.04538	4.67898
Metabolism; Biosynthesis of Other Secondary Metabolites; Tropane, piperidine and pyridine alkaloid biosynthesis	Tropane, piperidine and pyridine alkaloid biosynthesis	0.125815	0.128451	0.12648	0.125711	0.127424	0.129102	0.126537	0.126596	0.128071	0.126688	0.126383	0.12572	0.125091	0.125709	0.121759	0.120406
Metabolism; Amino Acid Metabolism; Tryptophan metabolism	Tryptophan metabolism	0.549715	0.550815	0.560525	0.556323	0.565073	0.572455	0.558228	0.550348	0.532308	0.558368	0.550417	0.546169	0.654455	0.540926	0.557864	0.511432
Human Diseases; Infectious Diseases; Tuberculosis	Tuberculosis	0.140701	0.137614	0.137253	0.137193	0.136599	0.136233	0.137519	0.141297	0.161312	0.138037	0.146825	0.153458	0.143144	0.137724	0.176765	0.148075
Environmental Information Processing; Signal Transduction; Two-component system	Two-component system	2.77752	2.72333	2.79617	2.82665	2.81346	2.80134	2.78821	2.76944	2.53777	2.78896	2.60196	2.65552	2.61197	2.78392	1.87208	2.70255
Human Diseases; Metabolic Diseases; Type I diabetes mellitus	Type I diabetes mellitus	0.0459573	0.0426683	0.0450834	0.0456135	0.0442714	0.0436215	0.0445016	0.0487096	0.0534701	0.0446289	0.0465211	0.0434408	0.0463479	0.0433146	0.0255304	0.0420592
Human Diseases; Metabolic Diseases; Type II diabetes mellitus	Type II diabetes mellitus	0.0401052	0.039017	0.0388008	0.0399714	0.0399453	0.0389207	0.038824	0.0395503	0.0431159	0.0391808	0.0449621	0.0450851	0.0376991	0.0397442	0.0726219	0.0451712
Metabolism; Amino Acid Metabolism; Tyrosine metabolism	Tyrosine metabolism	0.437447	0.396598	0.441089	0.432854	0.425389	0.430891	0.437279	0.443766	0.424318	0.437178	0.408063	0.411075	0.381949	0.412053	0.277228	0.399051
Metabolism; Metabolism of Cofactors and Vitamins; Ubiquinone and other terpenoid-quinone biosynthesis	Ubiquinone and other terpenoid-quinone biosynthesis	0.388048	0.388885	0.402128	0.404496	0.400888	0.396407	0.399082	0.405037	0.417762	0.402132	0.379086	0.40046	0.369054	0.392901	0.202404	0.37966
Genetic Information Processing; Folding, Sorting and Degradation; Ubiquitin system	Ubiquitin system	0.0102212	0.00697181	0.0084034	0.00876533	0.00961596	0.00925671	0.00831371	0.0105368	0.0164399	0.00849498	0.0112613	0.0103831	0.00421125	0.00711976	0.00666195	0.00934543
Metabolism; Amino Acid Metabolism; Valine, leucine and isoleucine biosynthesis	Valine, leucine and isoleucine biosynthesis	0.649525	0.711994	0.659564	0.658503	0.656331	0.655998	0.662621	0.651909	0.683609	0.662893	0.652842	0.665496	0.653527	0.687762	0.607159	0.651808
Metabolism; Amino Acid Metabolism; Valine, leucine and isoleucine degradation	Valine, leucine and isoleucine degradation	0.76909	0.694399	0.76966	0.755383	0.768009	0.783072	0.7645	0.759276	0.70832	0.760961	0.725994	0.723326	0.950403	0.706499	0.633255	0.661372
Metabolism; Glycan Biosynthesis and Metabolism; Various types of N-glycan biosynthesis	Various types of N-glycan biosynthesis	2.14483e-06	5.18029e-05	2.49507e-06	6.02783e-06	0	3.62345e-06	0	1.62841e-05	4.06157e-05	8.00752e-06	5.70834e-05	5.44409e-05	1.7886e-06	2.50431e-06	3.18652e-06	1.90044e-05
Organismal Systems; Circulatory System; Vascular smooth muscle contraction	Vascular smooth muscle contraction	0	0	0	0	0	0	0	0	0	0	0	0	0	0	0	0
Organismal Systems; Excretory System; Vasopressin-regulated water reabsorption	Vasopressin-regulated water reabsorption	0.000100807	6.18757e-05	2.74458e-05	6.88895e-06	4.97968e-05	0.000118366	1.95341e-05	4.02313e-05	0.000193633	2.00188e-05	0.000209618	0.000156266	1.52031e-05	2.00345e-05	0.00013702	3.91966e-05
Environmental Information Processing; Signal Transduction; VEGF signaling pathway	VEGF signaling pathway	0	0	0	0	0	0	0	5.74733e-06	1.32237e-05	2.00188e-06	1.12295e-05	0	0	0	0	0
Human Diseases; Infectious Diseases; Vibrio cholerae infection	Vibrio cholerae infection	0.0270935	0.0389098	0.0264469	0.0373898	0.036695	0.0285153	0.0257703	0.0261686	0.0170491	0.0264038	0.0366017	0.0275834	0.0175077	0.0360729	0.0279139	0.0277667
Human Diseases; Infectious Diseases; Vibrio cholerae pathogenic cycle	Vibrio cholerae pathogenic cycle	0.333808	0.293561	0.342194	0.362993	0.343478	0.326132	0.332937	0.343055	0.250178	0.335059	0.320891	0.296075	0.231708	0.328945	0.172126	0.345103
Human Diseases; Cardiovascular Diseases; Viral myocarditis	Viral myocarditis	0.0087402	0.00287722	0.0067974	0.00634558	0.00806811	0.00881706	0.00675879	0.00707688	0.0061103	0.00632594	0.00714011	0.00699565	0.00260777	0.00390923	0.00552118	0.00339229
Metabolism; Metabolism of Cofactors and Vitamins; Vitamin B6 metabolism	Vitamin B6 metabolism	0.186962	0.171292	0.183664	0.182481	0.180623	0.181297	0.183189	0.184561	0.178153	0.18253	0.169138	0.171245	0.157627	0.177593	0.101683	0.16948
Environmental Information Processing; Signal Transduction; Wnt signaling pathway	Wnt signaling pathway	1.82311e-05	2.87794e-06	1.66338e-06	0	0	1.20782e-06	0	5.74733e-06	5.00612e-05	4.00376e-06	1.87159e-05	0	0	8.3477e-07	0	1.18778e-06
Metabolism; Xenobiotics Biodegradation and Metabolism; Xylene degradation	Xylene degradation	0.04998	0.0172007	0.0472042	0.0453835	0.0412691	0.0418774	0.0450905	0.0509453	0.0375723	0.0446489	0.0409906	0.0338663	0.0246978	0.0308297	0.0224544	0.0344384
Metabolism; Metabolism of Terpenoids and Polyketides; Zeatin biosynthesis	Zeatin biosynthesis	0.0285938	0.0313386	0.0285137	0.0285254	0.0283883	0.0282677	0.0287483	0.0284732	0.0310124	0.028717	0.0340535	0.0318106	0.0322448	0.0301961	0.0645175	0.0338469
